# Supplementary material for: Apoptosis Induction by dsRNA-Dependent Protein Kinase R (PKR) in EPC Cells via Caspase 8 and 9 Pathways
Source: MDPI journal article supplement (doi:10.3390/v10100526), 2018-09-27
Supplement: s1 [file s1]

Supplementary Figure 1.

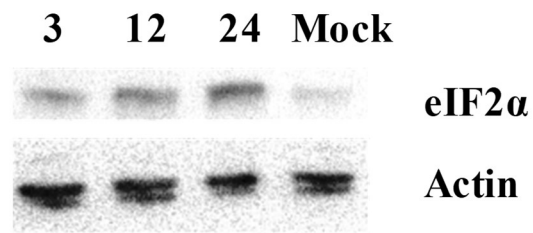

**Supplementary Figure 1.** eIF2 $\alpha$  phosphorylation in CHSE-214 cells following IPN virus infection as positive control. The numbers represent time in hours post infection. eIF2 $\alpha$  was induced already at 3 hpi increasing in up to 24 hpi. Western blot was performed using rabbit antibodies against the phosphorylated form of eIF2 $\alpha$ . Equal amounts of protein were loaded in each lane (7 $\mu$ g total protein).
